# Supplementary material
Source: PubMed Central journal article supplement (PMC3736732)
Supplement: NIHMS495697-supplement-supplement_1.pdf [file NIHMS495697-supplement-supplement_1.pdf]

## Supporting materials and methods

### Mice and diets

IRF9 KO mice were backcrossed with C57BL/6 mice for 6 or more generations. The genotyping forward primer 5'-TCAATGTTCCGATGTGGCAGTTCAAAGGATC-3' was used in combination with the reverse primer 5'-TATCGAATACTGCCAGCAGGAACCC-3' to detect endogenous IRF9 or 5'-TCCTGCTTTACGCTATCGCCGCTCCCGATT-3' to detect mutant IRF9 mRNA. We initiated our animal experiments using eight-week-old male mice. The mice were housed at controlled temperature ( $23 \pm 2^\circ\text{C}$ ) with a 12-hour light and a 12-hour dark cycle and given free access to water and a standard rodent diet prior to our study. Mouse body weight and fasting blood glucose levels were measured every four weeks, and food intake was monitored weekly.

### Tissue processing and histological analyses

After 26 weeks of diet treatment, the mice were anesthetized with 3% pentobarbital sodium, and macroscopic pictures of their physical appearance were taken. Next, the mice were sacrificed, and their livers were rapidly harvested and weighed. Each liver was cut into two parts: one part was immediately frozen in liquid nitrogen for molecular biological analysis, and the other part was either fixed in 10% formalin or frozen with Tissue-Tek<sup>®</sup> OCT<sup>™</sup> Compound (Japan) in dry ice and then embedded. Liver tissues were cut into sections and stained with H&E (5  $\mu\text{m}$  per section) to assess hepatic steatosis. For Oil red O staining, frozen liver sections (4  $\mu\text{m}$ ) were stained with Oil red O (Sigma) for 30 minutes. The sections were counterstained with Mayer hematoxylin after destaining in 60% isopropanol. Liver sections were also stained with anti-IRF9 antibody (Santa Cruz, sc10793), anti-HNF4 antibody (Abcam, ab41898) and immunofluorescent secondary antibody (Invitrogen,

1  
2  
3  
4 A11011). All digital images were obtained with a light microscope (Olympus DX51, Japan).  
5  
6 IRF9-positive cells were counted with Image Pro Plus 6.0.  
7  
8  
9

### 10 11 **Metabolic studies and serum cytokine analyses**

12  
13 For GTTs, an i.p. injection of 1 g/kg glucose (Sigma-Aldrich Co. St. Louis, MO, USA) was  
14 administered. For ITTs, an i.p. injection of 0.75 U/kg insulin (Novolin R, Novo Nordisk Co.,  
15 Bagsvaerd, Denmark) was administered. Blood glucose levels were measured with a glucometer  
16 (One Touch Ultra Easy, Life Scan) before glucose or insulin injection (after a 6-hour fast) and 15, 30,  
17 60, and 120 minutes after injection. Serum fasting insulin was measured by ELISA (Millipore). The  
18 homeostasis model assessment of the IR index was calculated as  $HOMA-IR = [FBG (mmol/l) \times$   
19  $FIns(mIU/l)]/22.5$ . Hepatic triglyceride, total cholesterol, and non-esterified fatty acid (NEFA) levels  
20 were determined using commercial kits (Wako). Triglycerides, total cholesterol, HDL-C, LDL-C,  
21 non-esterified fatty acid (NEFA), and  $\beta$ -hydroxybutyrate serum levels were determined using  
22 commercial kits (Wako and Abcam). Serum cytokines IL-1 $\beta$ , IL-6, IL-4, TNF- $\alpha$ , MCP-1, IL-10,  
23 leptin, resistin, and adiponectin were measured by ELISA (R&D, MBL, RayBio, Invitrogen,  
24 Peprotech). Additional details are included in the Supporting table 1.  
25  
26  
27  
28  
29  
30  
31  
32  
33  
34  
35  
36  
37  
38  
39  
40  
41  
42  
43  
44  
45

### 46 **Assessment of liver function**

47  
48 The hepatic enzyme ALT, AST and ALP serum activities were measured with a spectrophotometer  
49 (Chemix 180i, Sysmex Shanghai Ltd.), according to the manufacturer's instructions. Additional  
50 details are included in the Supporting table 1.  
51  
52  
53  
54  
55  
56  
57  
58  
59  
60

### RNA isolation and quantitative real-time PCR

Total RNA from liver tissue and primary hepatocytes was isolated using TRIzol reagent (7950567275, Roche). Two micrograms of total RNA was used for cDNA synthesis with Transcriptor First Stand cDNA Synthesis Kit (04896866001, Roche). Quantitative real-time PCR reactions were performed in 20  $\mu$ l volumes (Light Cycler 480 SYBR Green I Master, 04887352001, Roche) using the LightCycler® 480 Real-time PCR system (Roche) according to the manufacturer's instructions. Gene expression levels were calculated after normalization to the standard housekeeping gene  $\beta$ -actin and expressed as relative mRNA levels compared with the internal control. See the Supporting table 2 for the primer pairs used.

### Western blot

Liver tissue was lysed with RIPA lysis buffer containing 20  $\mu$ l PMSF, 100  $\mu$ l Complete protease inhibitors, 100  $\mu$ l PhosSTOP, 50  $\mu$ l NaF, and 10  $\mu$ l  $\text{Na}_3\text{VO}_4$ . Total protein was quantified with the BCA kit (Thermo). Fifty micrograms of each protein sample was used for SDS/PAGE electrophoresis, followed by transfer to a PVDF membrane (Millipore). Protein expression levels were quantified and normalized to GAPDH as a loading control. All the antibodies used in this study are listed in the Supporting table 3.

### Recombinant adenoviral vectors and in vivo adenovirus-mediated gene transfer

Hepatic IRF9 overexpression in two insulin-resistant mouse models (male C57BL/6 mice fed an HFD for 20 weeks and male *ob/ob* mice) was accomplished via jugular vein injection of GFP or Flag-tagged IRF9 ( $5 \times 10^9$  pfu) adenoviruses. PPAR $\alpha$  was overexpressed in the livers of 20-week,

1  
2  
3  
4 HFD-fed C57BL/6 mice and IRF9 KO mice by jugular vein injection of GFP or Flag-tagged PPAR $\alpha$   
5  
6 adenoviruses ( $5 \times 10^9$  pfu). Four weeks post-adenoviral injection, all the mice in each group were  
7  
8 sacrificed, and the tissues were rapidly removed; one section of the liver was frozen in liquid  
9  
10 nitrogen and stored at  $-80$  °C for further analysis. Other sections were fixed for future histology  
11  
12 analysis.  
13  
14  
15  
16  
17  
18

### 19 **Primary hepatocyte isolation and adenoviral infection**

20  
21 Mice were anesthetized with 3% Pentobarbital Sodium. Livers were perfused in situ via the superior  
22  
23 vena cava with perfusion buffer (0.9% saline), followed by digestion buffer (D Hanks' solution  
24  
25 supplemented with 0.05% trypsin 25200, [GIBCO]). The cell suspension was sterile filtered and  
26  
27 centrifuged at 50 g for 5 min to obtain hepatocytes. The hepatocytes were resuspended in DMEM  
28  
29 media (15% FBS, 5  $\mu$ g/ml insulin, 100 U/ml penicillin, 100 U/ml streptomycin) until the supernatant  
30  
31 was clear. Hepatocyte viability was determined by trypan blue exclusion using the Countess  
32  
33 (Invitrogen). Hepatocytes were seeded on collagen-coated dishes (Sigma) and cultivated for 24 h at  
34  
35 5% CO $_2$ , 37 °C. The cultivation medium was replaced with fresh FBS-free media, and the cells were  
36  
37 additionally incubated for 24 h before adenovirus administration. The cells were washed in PBS  
38  
39 followed by incubation with the adenoviruses expressing mutant IRF9, Flag-tagged full-length IRF9  
40  
41 or PPAR $\alpha$  for 24 h.  
42  
43  
44  
45  
46  
47  
48  
49  
50

### 51 **Plasmid Constructs**

52  
53 EGFP-myc-IRF9 recombinant was constructed by cloning encoding region of IRF9 gene of human  
54  
55 into *Eco*RI and *Xho*I sites of the pEGFP-myc-C1. HA-IRF9 was PCR amplified with IRF9-5' and  
56  
57  
58  
59  
60

1  
2  
3  
4 IRF9-3' which were showed in Supporting Table 4. To obtain the IRF9 fragment consisting of  
5  
6 residues 1 to 120, 210 to 393, and 120 to 220, HA-IRF9 were PCR amplified with IRF9-5' and  
7  
8 IRF9-N1-3', IRF9-C1-5' and IRF9-3', respectively. The products were digested with *EcoRI* and *XhoI*  
9  
10 and ligated into pEGFP-myc-C1 to create an in-frame fusion with EGFP-myc. To obtain IRF9  
11  
12 deletion mutant lacking 120-218, EGFP-myc-IRF9 was amplified with IRF9-dP-5' and IRF9-dP-3'.  
13  
14 The resulting PCR products were phosphorylated with T4 PNK and then ligated to create  
15  
16 EGFP-myc-IRF9 $\Delta$ 120-218. The Flag-PPAR $\alpha$  construct was generated by amplifying the encoding  
17  
18 region of PPAR $\alpha$  gene with primers PPAR $\alpha$ -5' and PPAR $\alpha$ -3' from Myc-PPAR $\alpha$  and subcloning into  
19  
20 pCMV-tag2B. To obtain the PPAR $\alpha$  fragment consisting of residues 1 to 101, 101-173, 173-278, and  
21  
22 278 to 468, Flag-PPAR $\alpha$  were PCR amplified with PPAR $\alpha$ -5' and PPAR $\alpha$ -A/B-3', PPAR $\alpha$ -C-5' and  
23  
24 PPAR $\alpha$ -C-3', PPAR $\alpha$ -D-5' and PPAR $\alpha$ -D-3', PPAR $\alpha$ -E-5' and PPAR $\alpha$ -3', respectively. The products  
25  
26 were digested with *BamHI* and *SaII* and ligated into pCMV-tag2B to create an in-frame fusion with  
27  
28 Flag. All plasmids were verified by sequencing. The primers for making constructs are shown in the  
29  
30 Supporting table 4.  
31  
32  
33  
34  
35  
36  
37  
38  
39  
40

### 41 Immunoprecipitation

42  
43 For immunoprecipitation, cultured HepG2 cells were cotransfected with HA-IRF9 and  
44  
45 FLAG-PPAR $\alpha$  for 48 h and lysed in NETN buffer (20 mM Tris-HCl, pH 8.0, 100 mM NaCl, 1  
46  
47 mM EDTA, and 0.5% NP-40) supplemented with protease inhibitor cocktail (Roche). Cell  
48  
49 homogenates were incubated for 20 minutes at 4°C with constant agitation and then centrifuged  
50  
51 (13,000 g for 10 minutes at 4°C). For each immunoprecipitation, 500  $\mu$ l of the sample was  
52  
53 incubated with 10  $\mu$ l Protein A/G-agarose beads (11719394001, 11719386001, Roche) and 1  $\mu$ g  
54  
55  
56  
57  
58  
59  
60

1  
2  
3  
4 antibody on a rocking platform (overnight at 4°C). according to the manufacturer's  
5  
6 recommendations. Finally, immunoprecipitates were washed 5-6 times with cold NETN buffer  
7  
8 before adding 1×loading buffer. Cell lysates and immunoprecipitates were immunoblotted using  
9  
10 the indicated primary antibodies, the corresponding secondary antibodies and the SuperSignal  
11  
12 chemiluminescence kit (Millipore).  
13  
14  
15  
16  
17

### 18 **GST pull-down assay**

19  
20 The GST-IRF9 constructed from pGEX-4T-1 was expressed in prokaryotic (Rosetta (DE3) E. coli).  
21  
22 For the pull-down assay, 10 ml E. coli (after IPTG induction) was harvested, and the purified GST  
23  
24 fusion protein was immobilized on the glutathione-Sepharose 4B beads (GE healthcare Bio-Sciences  
25  
26 AB). The GST-IRF9 beads were incubated with EGFP-Myc-PPAR $\alpha$ -transfected 293T cell lysates in  
27  
28 immunoprecipitation buffer (20 mM Tris-HCl, pH 8.0, 100 mM NaCl, 1 mM EDTA, and 0.5%  
29  
30 NP-40 supplemented with protease inhibitor cocktail) for 4 hours at 4 °C. GST tag was used as the  
31  
32 negative control under the same conditions. The samples were analyzed by western blot using  
33  
34 anti-Myc antibodies after washing with immunoprecipitation lysis buffer (no cocktail) four times.  
35  
36  
37  
38  
39  
40  
41  
42  
43

### 44 **Confocal microscopy of primary mouse hepatocytes**

45  
46 Primary mouse hepatocytes were seeded in a 12-well plate containing cover slips. After  
47  
48 pCherry-IRF9 and pEGFP-PPAR $\alpha$  cotransfection for 48 h, the cells were fixed in 4% fresh  
49  
50 paraformaldehyde for 15 minutes, permeabilized with 0.2% Triton X-100 in PBS for 5 minutes, then  
51  
52 incubated in Image-IT™ FX signal enhancer (I36933, Invitrogen) for 30 minutes. The cells were  
53  
54 washed with TBS-T three times and stained with DAPI (1 g/ml, 15 minutes). Finally, the slides were  
55  
56  
57  
58  
59  
60

1  
2  
3  
4  
5  
6  
7  
8  
9  
10  
11  
12  
13  
14  
15  
16  
17  
18  
19  
20  
21  
22  
23  
24  
25  
26  
27  
28  
29  
30  
31  
32  
33  
34  
35  
36  
37  
38  
39  
40  
41  
42  
43  
44  
45  
46  
47  
48  
49  
50  
51  
52  
53  
54  
55  
56  
57  
58  
59  
60

mounted with mounting solution (D2522, Sigma). Hepatocytes treated with secondary antibodies alone were used as a control. Images were obtained with a confocal laser-scanning microscope (Fluoview 1000; Olympus).

For Peer Review

## Supporting figure legends

**Supporting Figure 1. IRF9 deficiency does not affect food intake but enhances hepatic gluconeogenesis.**

(A) Energy of food intake by wild-type and IRF9 KO mice fed with the normal chow or HFD was calculated every week. n=28-39 per group. (B) Relative mRNA levels of gluconeogenesis genes PEPCK, G6Pase in liver extracts. n=6-12 per group. For all the statistical significance is indicated and compared with the WT HFD group, \*\*p < 0.01.

**Supporting Figure 2. IRF9 deficiency aggravates the hepatic steatosis upon HFD feeding.**

(A) Liver function was examined by measuring the levels of alanine transaminase (ALT), aspartate transaminase (AST) and alkaline phosphatase (ALP) in the serum by reagent kits, n=7 per group. (B) Immunoblot analysis indicated the inhibition of AMPK signaling in liver extracts from IRF9 KO mice. Protein expression levels were quantified and normalized to loading control GAPDH. All values are expressed as the mean  $\pm$  SEM. The statistical significance is indicated and compared with the WT HFD group, \*\*p<0.01, \*\*\*p < 0.001; compared with the WT NC group, ##p < 0.01.

**Supporting Figure 3. Hepatic IRF9 overexpression improves metabolism in diet-induced obese mice.**

(A) Immunoblot showed the IRF9 expression in livers, epididymal fat pads and gastrocnemius muscles four weeks after jugular vein injection of adenovirus within IRF9 cDNA or GFP sequence control. (B) Representative immunofluorescent images of liver section slides, which were stained with antibodies against hepatic nuclear factor 4 (HNF4, green) and IRF9 (red). DAPI (blue) was used



1  
2  
3  
4 to show the nuclei. Scale bar indicates 50  $\mu$ m. (C) The levels of TG, cholesterol and NEFA were  
5  
6 extracted in liver tissue from HFD group between WT with KO mice. n= 5 each group. (D) Liver  
7  
8 function was examined by measuring the levels of ALT, AST and ALP in the serum by reagent kits,  
9  
10 n=6 per group. (E) The mRNA levels of proinflammatory and anti-inflammatory markers in liver  
11  
12 were measured by real-time PCR. n=12 for each group. All values are expressed as mean  $\pm$  SEM.  
13  
14 The statistical significance is indicated and compared with the GFP adenovirus injected group, \*p <  
15  
16 0.05, \*\*p < 0.01.  
17  
18  
19  
20  
21  
22  
23

24 **Supporting Figure 4. Hepatic IRF9 overexpression improves metabolism in *ob/ob* mice.**

25  
26 (A) Immunoblot showed the IRF9 expression in livers, epididymal fat pads and gastrocnemius  
27  
28 muscles four weeks after jugular vein injection of adenovirus within IRF9 cDNA or GFP sequence  
29  
30 control. (B) Representative immunofluorescent images of liver section slides, which were stained  
31  
32 with antibodies against hepatic nuclear factor 4 (HNF4, green) and IRF9 (red). DAPI (blue) was used  
33  
34 to show the nuclei. Scale bar indicates 50  $\mu$ m. (C) The levels of TG, cholesterol and NEFA were  
35  
36 extracted in liver tissue from HFD group between WT with KO mice. n= 5 each group. (D) Liver  
37  
38 function was examined by measuring the levels of ALT, AST and ALP in the serum by reagent kits,  
39  
40 n=7 per group. (E) The mRNA levels of proinflammatory and anti-inflammatory markers in liver  
41  
42 were measured by real-time PCR. n=12 for each group. All values are expressed as mean  $\pm$  SEM.  
43  
44 The statistical significance is indicated and compared with the GFP adenovirus injected group, \*p <  
45  
46 0.05, \*\*p < 0.01.  
47  
48  
49  
50  
51  
52  
53  
54  
55  
56

57 **Supporting Figure 5. IRF9 interacts with PPAR $\alpha$  to activate PPAR $\alpha$  target genes.**

1  
2  
3  
4 (A) The mRNA levels of PPAR $\alpha$  target genes in the primary mouse hepatocytes transfected with  
5  
6 GFP or IRF9 plasmid are examined by real-time PCR. (B) The mRNA levels of PPAR $\alpha$  target genes  
7  
8 in the primary mouse hepatocytes transfected with GFP or mutant IRF9 plasmid of which the  
9  
10 PPAR $\alpha$ -interaction domain was deleted. (C) The mRNA levels of PPAR $\alpha$  target genes in the liver  
11  
12 of WT mice fed with HFD injected with adenovirus containing GFP or IRF9. (D) The mRNA levels  
13  
14 of PPAR $\alpha$  target genes in the liver of *ob/ob* mice injected with adenovirus containing GFP or IRF9.  
15  
16 In (A) to (D), values are presented as the mean  $\pm$  SEM, and statistical significance is indicated and  
17  
18 compared with the Ad-GFP group, \* $p < 0.05$ , \*\* $p < 0.01$ .  
19  
20  
21  
22  
23  
24  
25

26 **Supporting Figure 6. Hepatic PPAR $\alpha$  overexpression rescues deregulated metabolism in IRF9**  
27  
28 **KO mice.**  
29

30  
31 (A) The mRNA levels of PPAR $\alpha$  target genes in primary mouse hepatocytes infected with adenovirus  
32  
33 expressing IRF9 or vector controls. (B) Immunoblot showed the PPAR $\alpha$  expression in livers four  
34  
35 weeks after jugular vein injection of adenovirus within PPAR $\alpha$  cDNA or GFP sequence control. (C)  
36  
37 The mRNA levels of PPAR $\alpha$  and its target genes were determined by real-time PCR. (D) The levels  
38  
39 of TG, cholesterol and NEFA were extracted in liver tissue from HFD group between WT with KO  
40  
41 mice.  $n = 5$  for each group. (E) Liver function was examined by measuring the levels of ALT, AST  
42  
43 and ALP in the serum by reagent kits,  $n = 7-9$  per group. (F and G) The mRNA levels of  
44  
45 proinflammatory and anti-inflammatory markers in livers of WT and IRF9 KO mice were measured  
46  
47 by real-time PCR.  $n = 9-12$  for each group. All values are expressed as mean  $\pm$  SEM. The statistical  
48  
49 significance is indicated and compared with the GFP adenovirus injected WT group, \* $p < 0.05$ ;  
50  
51 compared with PPAR $\alpha$  adenovirus injected WT group, <sup>+</sup> $p < 0.05$ ; compared with the GFP adenovirus  
52  
53  
54  
55  
56  
57  
58  
59  
60

1  
2  
3  
4  
5  
6  
7  
8  
9  
10  
11  
12  
13  
14  
15  
16  
17  
18  
19  
20  
21  
22  
23  
24  
25  
26  
27  
28  
29  
30  
31  
32  
33  
34  
35  
36  
37  
38  
39  
40  
41  
42  
43  
44  
45  
46  
47  
48  
49  
50  
51  
52  
53  
54  
55  
56  
57  
58  
59  
60

injected IRF9 KO group, #p< 0.05.

For Peer Review

Supporting Figure 1

**A**

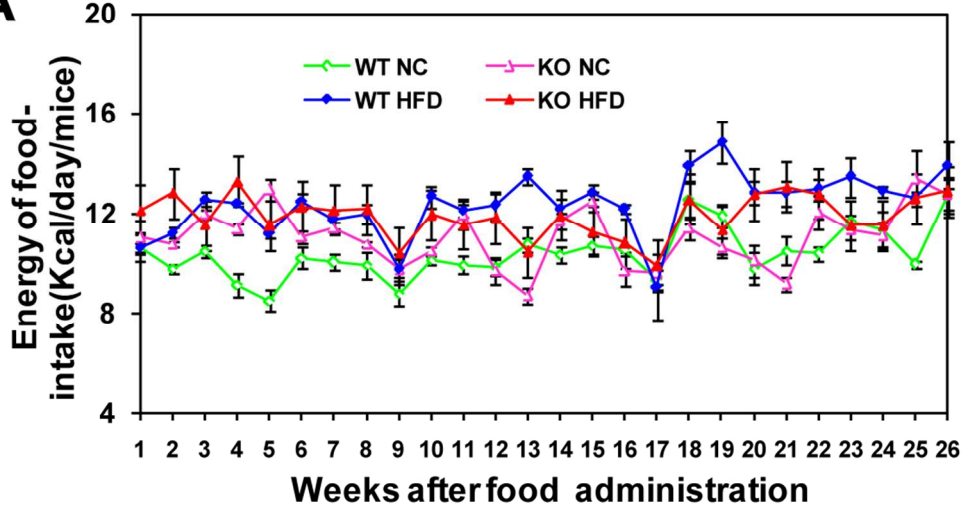

**B**

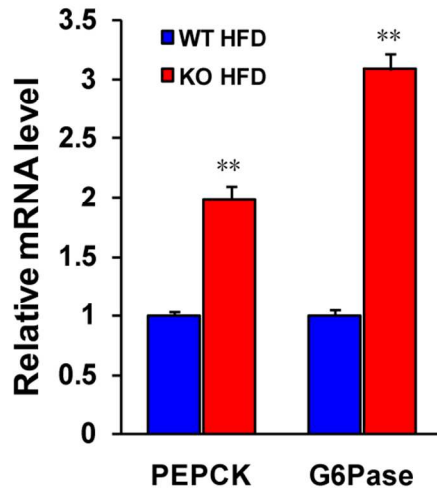

98x109mm (300 x 300 DPI)

## Supporting Figure 2

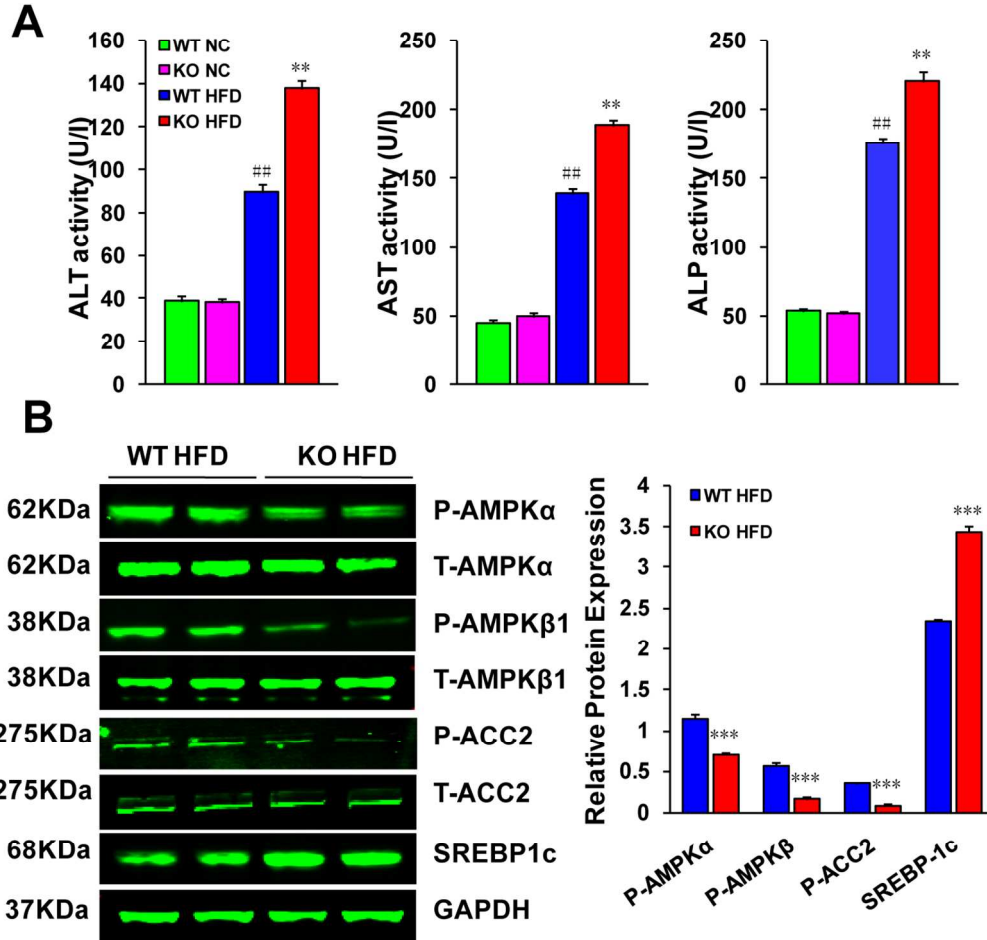

125x125mm (300 x 300 DPI)

Supporting Figure 3

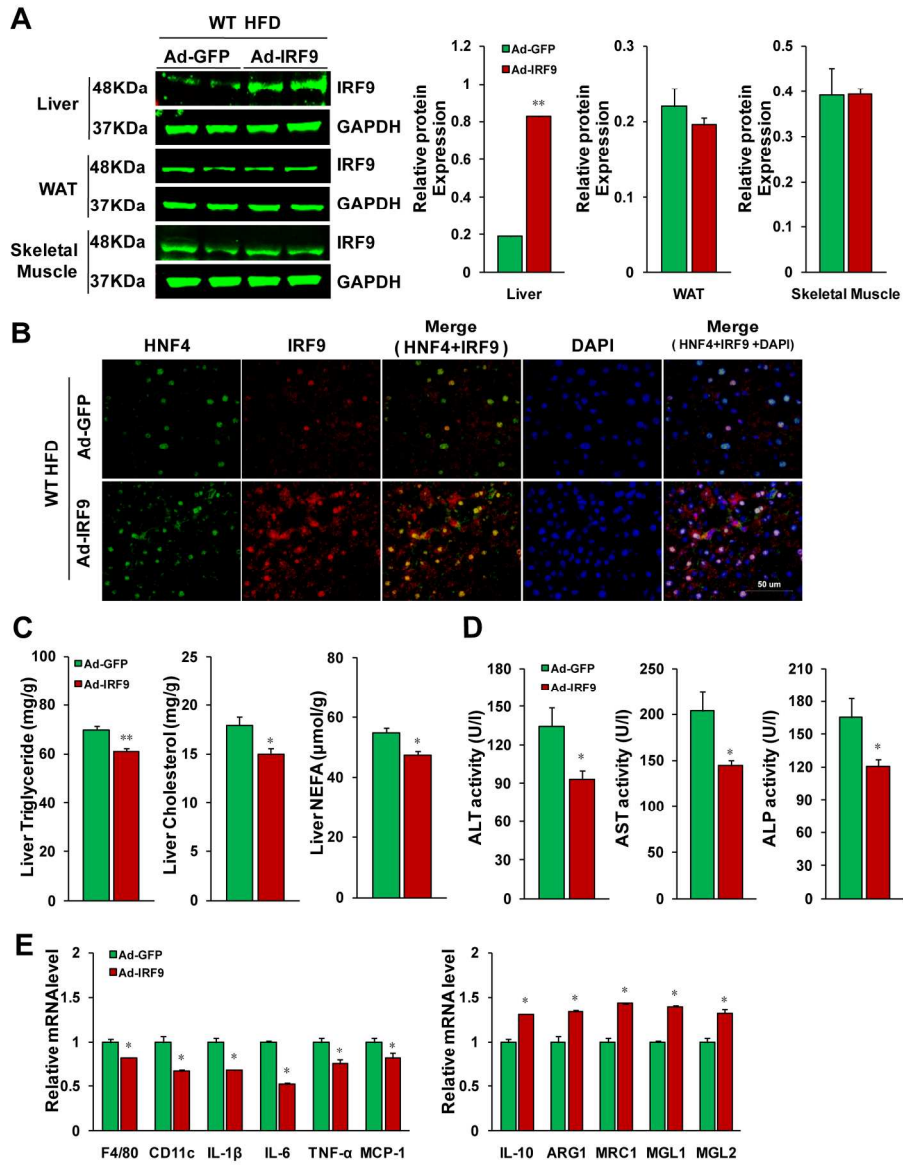

168x227mm (300 x 300 DPI)

Supporting Figure 4

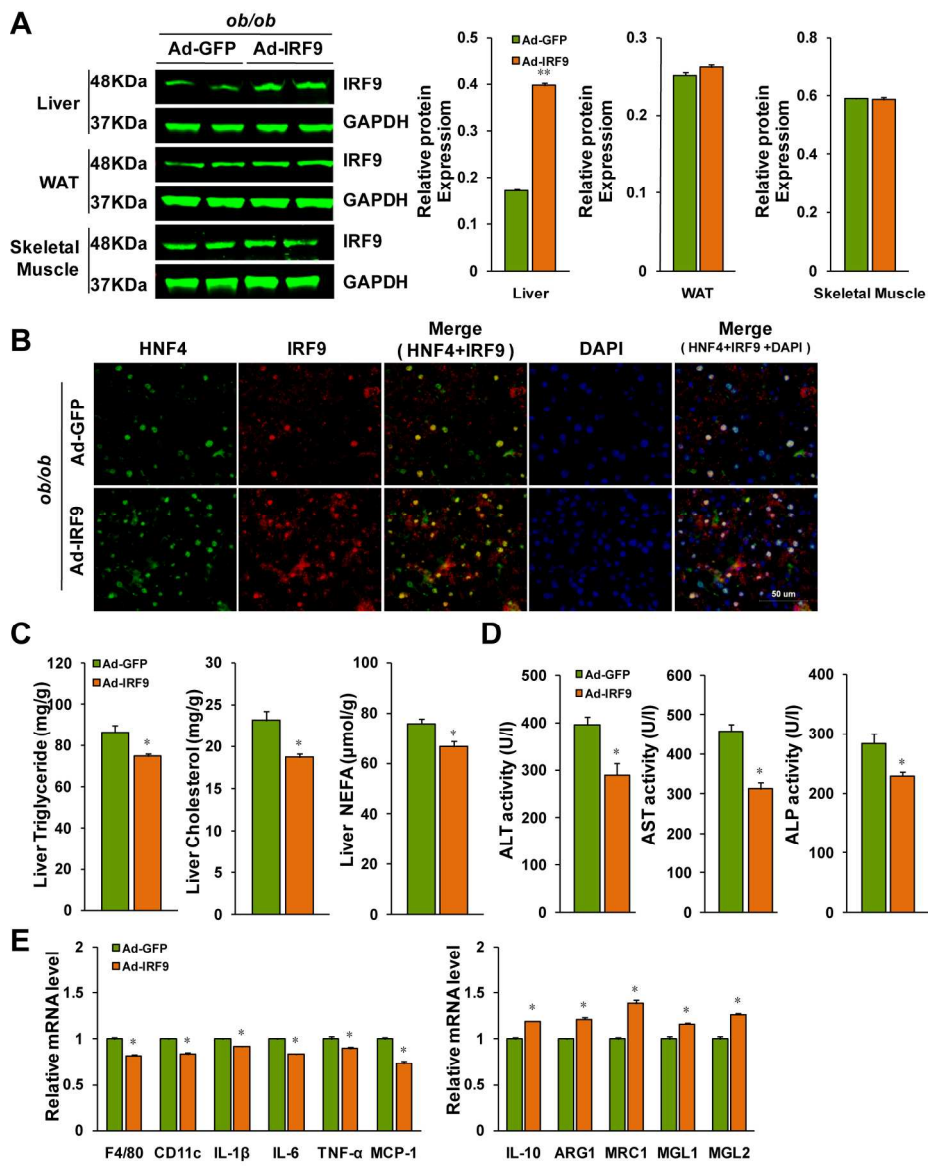

168x220mm (300 x 300 DPI)

## Supporting Figure 5

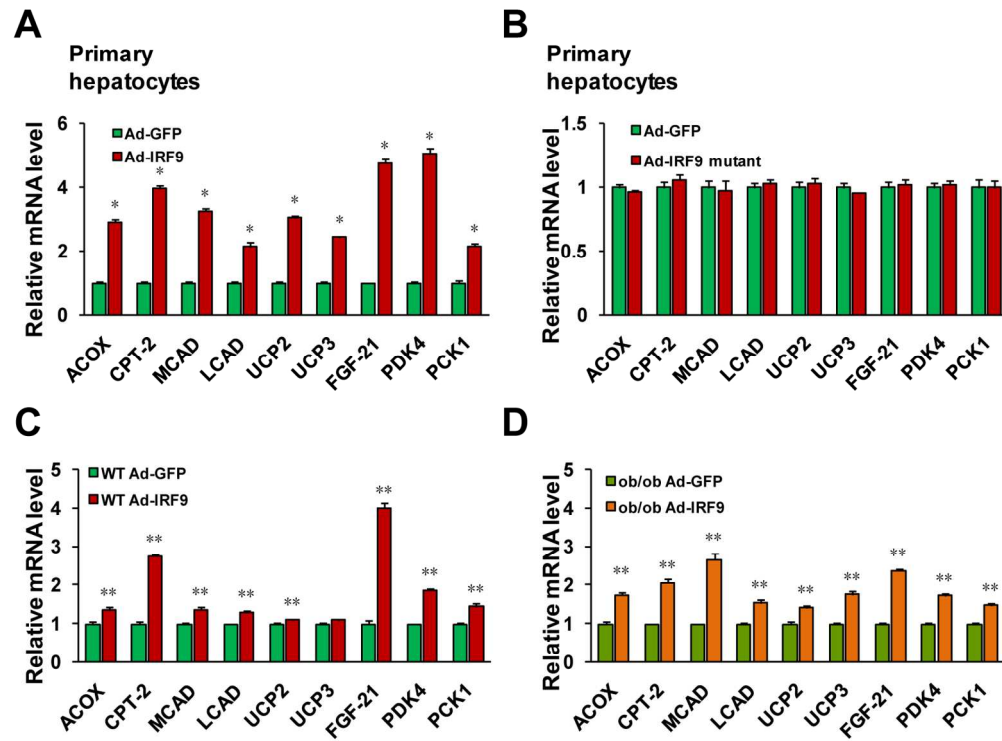

145x114mm (300 x 300 DPI)



Supporting Figure 6

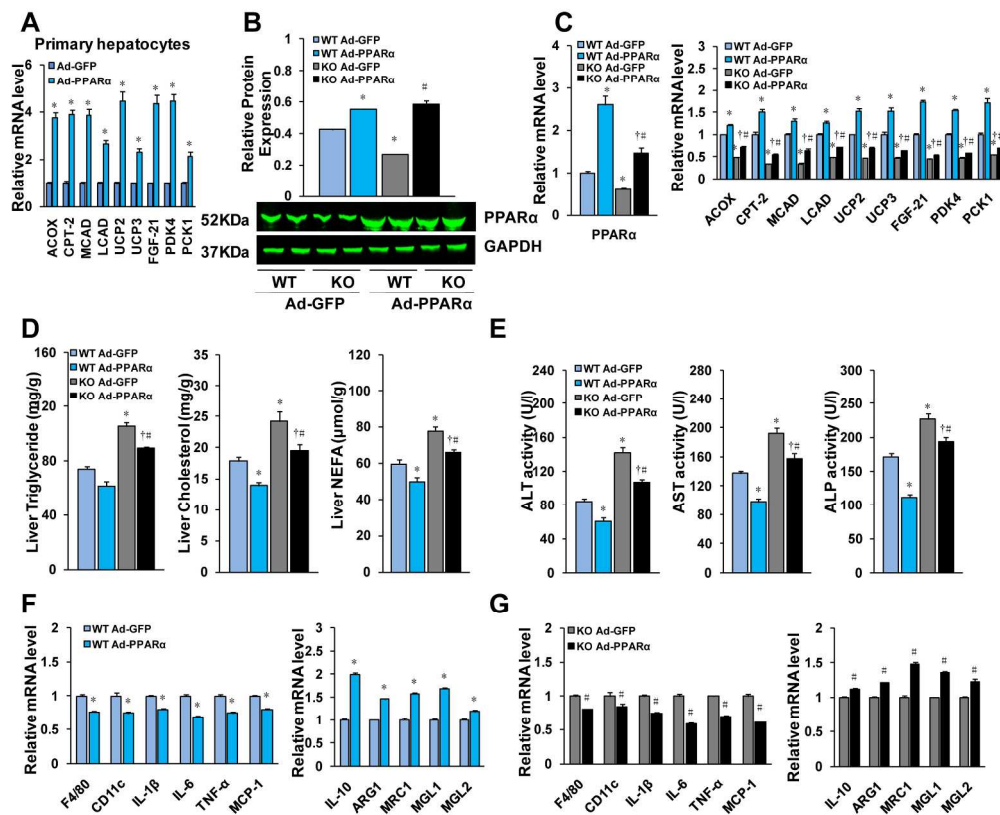

209x178mm (300 x 300 DPI)

## Supporting Tables

**Supporting table 1. Serum biochemical and cytokine, hormone analysis and liver function analysis kits.**

| Item                                     | Manufacturer                  | Cat No.          |
|------------------------------------------|-------------------------------|------------------|
| Mouse CCL2/JE/MCP-1 Quantikine ELISA Kit | R&D                           | MJE00            |
| Mouse Adiponectin ELISA Assay Kit        | MBL international corporation | #JM-K4902-100    |
| RayBio® Mouse IL-1 $\beta$ ELISA Kit     | RayBio                        | ELM-IL1beta-001  |
| RayBio® Mouse Leptin ELISA Kit           | RayBio                        | ELM-LEPTIN-001   |
| RayBio® Mouse Resistin ELISA Kit         | RayBio                        | ELM-Resistin-001 |
| Mouse IL-10                              | Invitrogen                    | KMC0101          |
| Mouse IL-4                               | Invitrogen                    | KMC0041          |
| Mouse IL-6                               | Invitrogen                    | KMC0061          |
| Mouse TNF- $\alpha$                      | Peptotech                     | ADI-900-047      |
| rat / mouse insulin ELISA kit            | Millipore                     | EZRMI-13K        |
| beta Hydroxybutyrate (beta HB) Assay Kit | abcam                         | ab83390          |
| Cholesterol E, Total                     | Wako                          | 439-17501        |
| L-Type LDL-C Reagent 1                   | Wako                          | 993-00404        |
| L-Type LDL-C Reagent 2                   | Wako                          | 999-00504        |
| HDL-C/LDL-C Calibrator                   | Wako                          | 990-28011        |
| HDL-Cholesterol E                        | Wako                          | 431-52501        |
| L-Type TG M Enzyme Color A               | Wako                          | 461-08992        |
| L-Type TG M Enzyme Color B               | Wako                          | 461-09092        |
| Multi-Calibrator Lipid                   | Wako                          | 464-01601        |
| HR Series NEFA-HR(2) Color Reagent A     | Wako                          | 999-34691        |
| HR Series NEFA-HR(2) Solvent A           | Wako                          | 995-34791        |
| HR Series NEFA-HR(2) Color Reagent B     | Wako                          | 991-34891        |
| HR Series NEFA-HR(2) Solvent B           | Wako                          | 993-35191        |
| Wako NEFA Linearity Set                  | Wako                          | 997-76491        |

|    |                        |                   |           |
|----|------------------------|-------------------|-----------|
| 1  |                        |                   |           |
| 2  |                        |                   |           |
| 3  | NEFA Standard Solution | Wako              | 276-76491 |
| 4  | AST-R1                 | SYSMEX (Shanghai) | 290505    |
| 5  | AST-R2                 | SYSMEX (Shanghai) | 290506    |
| 6  | ALT-R1                 | SYSMEX (Shanghai) | 290503    |
| 7  | ALT-R2                 | SYSMEX (Shanghai) | 290504    |
| 8  | ALP-R1                 | SYSMEX (Shanghai) | 290501    |
| 9  | ALP-R2                 | SYSMEX (Shanghai) | 290502    |
| 10 |                        |                   |           |
| 11 |                        |                   |           |
| 12 |                        |                   |           |
| 13 |                        |                   |           |

Supporting table 2. Primers for Real-time PCR detection.

| Gene     |         | Sequence 5'---3'         |
|----------|---------|--------------------------|
| β-actin  | forward | AGATCATTGCTCCTCCTGAGCGCA |
|          | reverse | AAACGCAGCTCAGTAACAGTCCGC |
| IRF9     | forward | ACAACCTGAGGCCACCATTAGAGA |
|          | reverse | CACCACTCGGCCACCATAG      |
| PEPCK    | forward | TGCCCCAGGCAGTGAGGAAGTT   |
|          | reverse | GTCAGTGAGAGCCAGCCAACAGT  |
| G6Pase   | forward | TCTGTCCCGGATCTACCTTG     |
|          | reverse | GCTGGCAAAGGGTGTAGTGT     |
| HMGCR    | forward | ATCATGTGCTGCTTCGGCTGCAT  |
|          | reverse | AAATTGGACGACCCTCACGGCT   |
| LDLR     | forward | ATGAGTGGCCACAGAACTGCC    |
|          | reverse | ATGCAGGAGCCATCTGCACACT   |
| LXR-α    | forward | TTGCCAAACAGCTCCCTGGCTT   |
|          | reverse | TTGATGAACTCCACCTGCAGCCCT |
| ABCA1    | forward | AGGCACTCAAGCCACTGCTTGT   |
|          | reverse | TGCCTCTGCTGTCTAACAGCGT   |
| ABCG1    | forward | TGAACCCGTTTCTTTGGCACCG   |
|          | reverse | AGTCCCGCATGATGCTGAGGAA   |
| ABCG5    | forward | ACACCGGCATGCTCAATGCTGT   |
|          | reverse | AAATGACCGTGCGATGACGCT    |
| ABCG8    | forward | AGGAAGTGCGTTGCGCATGT     |
|          | reverse | TCTTCCACCCGTTTGTACGCT    |
| CYP7A1   | forward | TCAAAGAGCGCTGTCTGGGTCA   |
|          | reverse | TTTCCCGGGCTTTATGTGCGGT   |
| SREBP-1c | forward | CACTTCTGGAGACATCGAAAC    |
|          | reverse | ATGGTAGACAACAGCCGCATC    |
| ACCα     | forward | GGCCAGTGCTATGCTGAGAT     |

|    |                |         |                            |
|----|----------------|---------|----------------------------|
| 1  |                |         |                            |
| 2  |                |         |                            |
| 3  |                | reverse | AGGGTCAAGTGCTGCTCCA        |
| 4  | FAS            | forward | CTGCGGAAACTTCAGGAAATG      |
| 5  |                | reverse | GGTTCGGAATGCTATCCAGG       |
| 6  |                |         |                            |
| 7  | SCD1           | forward | TCTTCCTTATCATTGCCAACACCA   |
| 8  |                | reverse | GCGTTGAGCACCAGAGTGTATCG    |
| 9  |                |         |                            |
| 10 | CD36           | forward | TGGGTTTTGCACATCAAAGA       |
| 11 |                | reverse | GATGGACCTGCAAATGTCAGA      |
| 12 |                |         |                            |
| 13 | FABP1          | forward | TGGTCCGCAATGAGTTCACCCT     |
| 14 |                | reverse | CCAGCTTGACGACTGCCTTGACTT   |
| 15 |                |         |                            |
| 16 | FATP1          | forward | TGCACAGCAGGTACTACCGCAT     |
| 17 |                | reverse | TGCGCAGTACCACCGTCAAC       |
| 18 |                |         |                            |
| 19 | DGAT1          | forward | TCCAGTGGGTTCCTGTTTGCT      |
| 20 |                | reverse | ATAGCTCACAGCTTGCTGGGCA     |
| 21 |                |         |                            |
| 22 | DGAT2          | forward | AGATCGCAGTGGGTGCGAAACT     |
| 23 |                | reverse | TTCCTGGTGGTCAGCAGGTTGT     |
| 24 |                |         |                            |
| 25 | GPAT           | forward | TTCTCTTCACCGCCAGCAAGTCCT   |
| 26 |                | reverse | TCCTGCTCGTGTGGGTGATTGTGA   |
| 27 |                |         |                            |
| 28 | ATGL           | forward | TGGATGGCGGCATTCAGACA       |
| 29 |                | reverse | TGACGCGAAGCTCGTGGATGTT     |
| 30 |                |         |                            |
| 31 | HSL            | forward | AAACGCAACGAGACAGGCCTCA     |
| 32 |                | reverse | ATGCCATGTTGGCCAGAGACGA     |
| 33 |                |         |                            |
| 34 | PPAR- $\alpha$ | forward | TATTCGGCTGAAGCTGGTGTAC     |
| 35 |                | reverse | CTGGCATTGTTCGGTTCT         |
| 36 |                |         |                            |
| 37 | ACOX           | forward | CGGAAGATACATAAAGGAGACC     |
| 38 |                | reverse | AAGTAGGACACCATAACCACC      |
| 39 |                |         |                            |
| 40 | CPT-1 $\alpha$ | forward | AGGACCCTGAGGCATCTATT       |
| 41 |                | reverse | ATGACCTCCTGGCATTCTCC       |
| 42 |                |         |                            |
| 43 | CPT-2          | forward | CATCGTACCCACCATGCACT       |
| 44 |                | reverse | CTCCTTCCCAATGCCGTTCT       |
| 45 |                |         |                            |
| 46 | MCAD           | forward | TGGCGTATGGGTGTACAGGG       |
| 47 |                | reverse | CCAAATACTTCTTTTTTTGTTGATCA |
| 48 |                |         |                            |
| 49 | LCAD           | forward | GGAGTAAGAACGAACGCCAA       |
| 50 |                | reverse | GCCACGACGATCACGAGAT        |
| 51 |                |         |                            |
| 52 | UCP2           | forward | GCTGGTGGTGGTCGGAGATA       |
| 53 |                | reverse | ACTGGCCCAAGGCAGAGTT        |
| 54 |                |         |                            |
| 55 | UCP3           | forward | TGCTGAGATGGTGACCTACGA      |
| 56 |                | reverse | CCAAAGGCAGAGACAAAGTGA      |
| 57 |                |         |                            |
| 58 | FGF-21         | forward | AAGACACTGAAGCCCACCTG       |
| 59 |                | reverse | CTGCAGGCCTCAGGATCAAA       |
| 60 |                |         |                            |

|               |         |                          |
|---------------|---------|--------------------------|
| PDK4          | forward | TTCACACCTTCACCACATGC     |
|               | reverse | AAAGGGCGGTTTTCTTGATG     |
| PCK1          | forward | CAGTCATCATCACCCAAGAGCA   |
|               | reverse | GGGCGAGTCTGTCAGTTCAATAC  |
| F4/80         | forward | TCCTGCTGTGTCGTGCTGTTCA   |
|               | reverse | ATCCCGCAATGATGGCACAAGC   |
| CD11c         | forward | TTCCTGGCTGTTGGCTTGTGGT   |
|               | reverse | TGGACACTCCTGCTGTGCAGTT   |
| IL-1 $\beta$  | forward | CCGTGGACCTTCCAGGATGA     |
|               | reverse | GGGAACGTCACACACCAGCA     |
| IL-6          | forward | AGTTGCCTTCTTGGGACTGA     |
|               | reverse | TCCACGATTTCCCAGAGAAC     |
| TNF- $\alpha$ | forward | CATCTTCTCAAATTCGAGTGACAA |
|               | reverse | TGGGAGTAGACAAGGTACAACCC  |
| MCP1          | forward | TAAAAACCTGGATCGGAACCAAA  |
|               | reverse | GCATTAGCTTCAGATTTACGGGT  |
| IL-10         | forward | CCAAGCCTTATCGGAAATGA     |
|               | reverse | TTTTACAGGGGAGAAATCG      |
| iNOS          | forward | TGCGCCTTTGCTCATGACATCGA  |
|               | reverse | ATGGATGCTGCTGAGGGCTCTGTT |
| ARG1          | forward | TGCAGCACTGAGGAAAGCTGGT   |
|               | reverse | ACCCAGCACCACACTGACTCTT   |
| MRC1          | forward | ACAACAGACAGGAGGACTGCGT   |
|               | reverse | AACCCATGCCGTTTCCAGCCTT   |
| MGL1          | forward | AACCCAAGAGCCTGGTAAAGCAGC |
|               | reverse | ATCCAATCACGGAGACGACCACCA |
| MGL2          | forward | AGGCCACTGCAGCCGGATAACT   |
|               | reverse | GCTGGCTTTGCCAGCTCTGTT    |

Supporting table 3. Antibodies for immunoblot analyses.

| Antibody        | Protein interaction sites | Cat No. | Manufacturer | Sources of species | Molecular Weight (KDa) | Dilution |
|-----------------|---------------------------|---------|--------------|--------------------|------------------------|----------|
| GAPDH           |                           | MB001   | Bioworld     | mouse              | 37                     | 1/10000  |
| IRF9            |                           | sc10793 | santa        | rabbit             | 48                     | 1/200    |
| PPAR $\alpha$   |                           | ab8934  | abcam        | rabbit             | 52                     | 1/500    |
| P-AMPK $\alpha$ | thr172                    | 2535    | cst          | rabbit             | 62                     | 1/1000   |

|    |                       |            |           |        |        |        |
|----|-----------------------|------------|-----------|--------|--------|--------|
| 1  |                       |            |           |        |        |        |
| 2  |                       |            |           |        |        |        |
| 3  | T-AMPK $\alpha$       | 2603       | cst       | rabbit | 62     | 1/1000 |
| 4  | P-AMPK $\beta$ ser108 | 4181       | cst       | rabbit | 38     | 1/1000 |
| 5  |                       |            |           |        |        |        |
| 6  | T-AMPK $\beta$        | 4150       | cst       | rabbit | 38     | 1/1000 |
| 7  |                       |            |           |        |        |        |
| 8  | P-ACC2 ser219/ser221  | sc-30446-R | santa     | rabbit | 280    | 1/200  |
| 9  | T-ACC2                | 3676       | cst       | rabbit | 280    | 1/1000 |
| 10 | SREBP-1c              | ab3259     | abcam     | mouse  | 120,60 | 1/1000 |
| 11 | P-IRS-1 Tyr608        | 09-432     | millipore | rabbit | 170    | 1/1000 |
| 12 |                       |            |           |        |        |        |
| 13 | T-IRS-1               | 2382       | cst       | rabbit | 180    | 1/1000 |
| 14 |                       |            |           |        |        |        |
| 15 | P-AKT ser473          | 4060       | cst       | rabbit | 60     | 1/1000 |
| 16 | T-AKT                 | 4691       | cst       | rabbit | 60     | 1/1000 |
| 17 |                       |            |           |        |        |        |

Supporting table 4. The primers for making constructs.

| Primer name           | Primer sequence (5'-3')                     |
|-----------------------|---------------------------------------------|
| IRF9-5'               | CCGGAATTC <sup>#</sup> ATGGCATCAGGCAGGGCACG |
|                       | CCGCTCGAGCTACACCAGGGACAGAATGGC              |
| IRF9-3'               | TG                                          |
|                       | CCGCTCGAGCTAGACGATTCTGGTGGCAGC              |
| IRF9-N1-3'            | A                                           |
| IRF9-C1-5'            | CCGGAATTC <sup>#</sup> TTTCTGCTTCCTCCAGAGCC |
| IRF9-N2-5'            | CCGGAATTC <sup>#</sup> GTCTCTGGCCAGCCAGGGAC |
|                       | CCGCTCGAGCTACAGTGAGTAGTCTGGCTCT             |
| IRF9-N2-3'            | G                                           |
| IRF9-dP-5'            | TCACTGCTGCTCACCTTCATC                       |
| IRF9-dP-3'            | GATTCCTGGTGGCAGCAACTG                       |
| PPAR $\alpha$ -5'     | CGCGGATCCATGGTGGACACGGAAAGCCC               |
| PPAR $\alpha$ -3'     | ACGCGTCGACTCAGTACATGTCCCTGTAGAT             |
|                       | ACGCGTCGACTCATTTCGATGTTCAATGCTCC            |
| PPAR $\alpha$ -A/B-3' | AC                                          |
| PPAR $\alpha$ -C-5'   | CGCGGATCCGAATGTAGAATCTGCGGGGA               |
|                       | ACGCGTCGACTCAAAAACGAATCGCGTTGT              |
| PPAR $\alpha$ -C-3'   | GTG                                         |
| PPAR $\alpha$ -D-5'   | CGCGGATCC <sup>#</sup> TTTGGACGAATGCCAAGATC |
|                       | ACGCGTCGACTCAGCACTGGCAGCAGTGAA              |
| PPAR $\alpha$ -D-3'   | AGA                                         |
| PPAR $\alpha$ -E-5'   | CGCGGATCC <sup>#</sup> TGCACGTCAGTGGAGACCGT |

<sup>#</sup>Sites for restriction enzyme are underlined.
